# Supplementary material for: Low energy availability assessed by a sport-specific questionnaire and clinical interview indicative of bone health, endocrine profile and cycling performance in competitive male cyclists
Source: PubMed Central journal article supplement — BMJ Open Sport Exerc Med. 2018 Oct 4;4(1):e000424. doi: 10.1136/bmjsem-2018-000424 (PMC6196965; doi:10.1136/bmjsem-2018-000424), 2018-10-04
Supplement: bmjsem-2018-000424supp001.pdf [file bmjsem-2018-000424supp001.pdf]

| <b>Study of Competitive Road Cyclists</b> |                                                                                                                                                                                                                                                                                        | Please complete this column |
|-------------------------------------------|----------------------------------------------------------------------------------------------------------------------------------------------------------------------------------------------------------------------------------------------------------------------------------------|-----------------------------|
| <b>Subject</b>                            | Name<br>Age<br>DOB<br>Height (m)<br>Weight (kg)<br>Contact Email<br>Contact Mobile                                                                                                                                                                                                     |                             |
| <b>Address</b><br>(for blood test kits)   | Address Line 1<br>Address Line 2<br>Town<br>Post code                                                                                                                                                                                                                                  |                             |
| <b>Cycling history</b>                    | Current cycle racing category<br>Years of cycling training<br>Training load: average hours on bike per week<br>Training load: any S&C or off bike exercise?<br>60 min Functional Threshold Power: watts<br>Type cyclist (TT/Climber/Sprinter/All round)<br>Previous sports to cycling? |                             |
| <b>Nutrition</b>                          | Weight steady?<br>Vegetarian/food intolerances?<br>Supplements?<br>Fasted rides per week?<br>Fuelling during ride > 1 hour?<br>Post ride fuelling?<br>Average number of portions dairy per day?<br>Average caffeine per day (coffee/gels etc)                                          |                             |
| <b>Medical</b>                            | Past Medical History<br>Injury history<br>Medical Drug History (current and previous, including any courses steroids)<br>Current or past smoking<br>Weekly alcohol units<br>Family History (osteoporosis?)                                                                             |                             |
